# Supplementary material for: Water assisted high proton conductance in a pure-inorganic framework vanadoborate
Source: Royal Society of Chemistry journal article supplement (doi:10.1039/d1nj05335c), 2021-12-08
Supplement: d1nj05335c1.pdf [file d1nj05335c1.pdf]

## Supplementary Information

### Water assisted high proton conductance in a pure-inorganic framework vanadoborate

Xinxin Liu <sup>a</sup>, Le Zhang <sup>b</sup>, SiSi Zhao <sup>a</sup>, Biao Guo <sup>a,\*</sup> and Zhen Zhao <sup>a,\*</sup>

<sup>a</sup>. Institute of Catalysis for Energy and Environment, College of Chemistry and Chemical Engineering, Shenyang Normal University, Shenyang 110034, China;

<sup>b</sup>. School of Pharmacy, Xinxiang University, Xinxiang 453000, P. R China;

\*Corresponding author: zhenzhao@cup.edu.cn; biaoguo@126.com

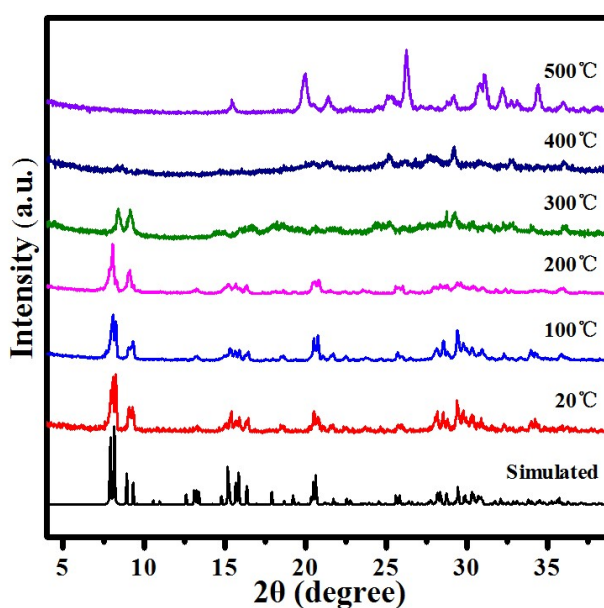

Fig. S1. In situ powder X-ray diffraction patterns of 1 in air.

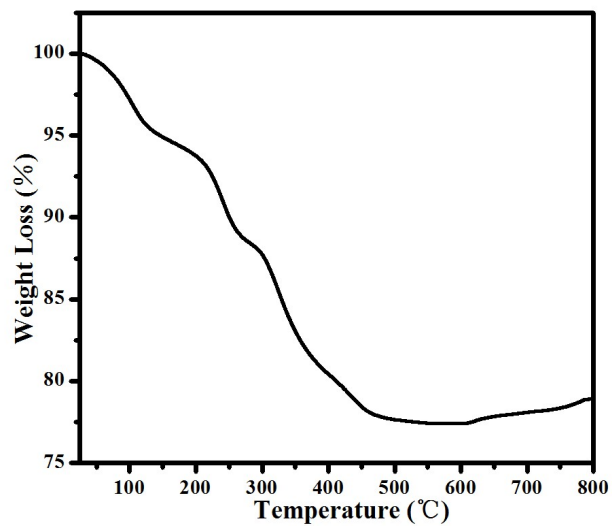

**Fig. S2.** TG curve of 1 in air.

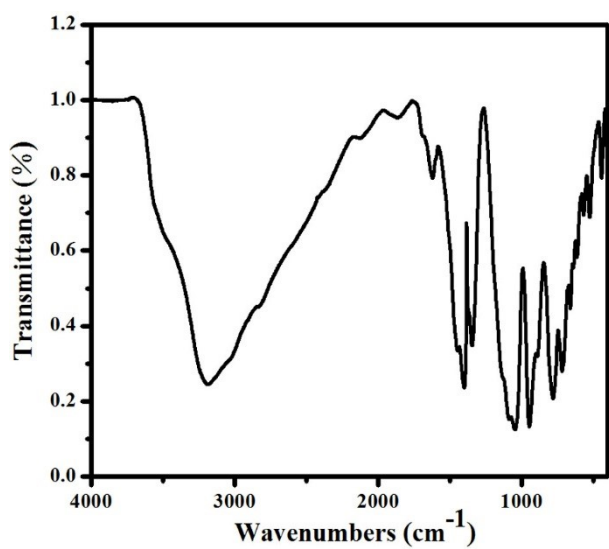

**Fig. S3.** The FT-IR spectrum of 1.

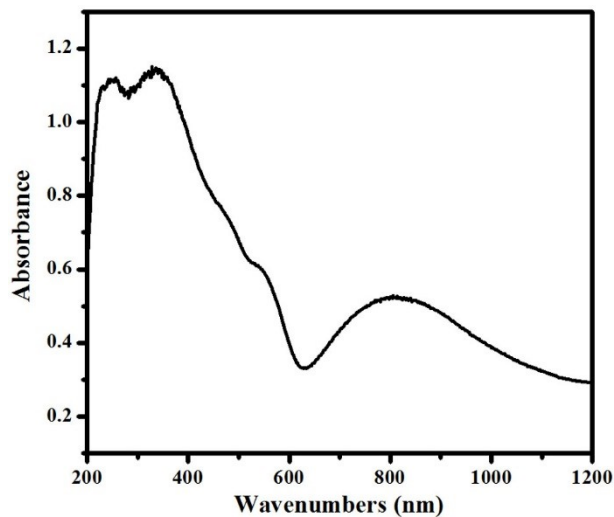

**Fig. S4.** UV-Vis-NIR diffuse reflectance spectrum of **1**.

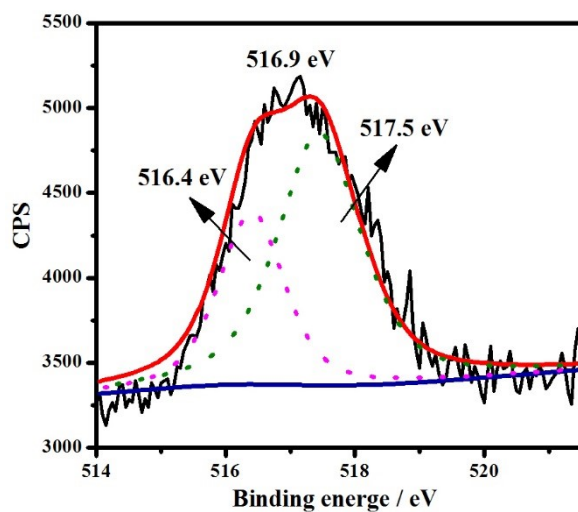

**Fig. S5.** XPS spectrum of vanadium in  $\text{H}_{10}[\text{V}_{12}\text{B}_{18}\text{O}_{54}(\text{OH})_6]\cdot 20\text{H}_2\text{O}$ . The peak at 516.4 eV is attributed to  $\text{V}^{4+}$  and a shoulder at about 517.5 eV is assigned to for  $\text{V}^{5+}$ .

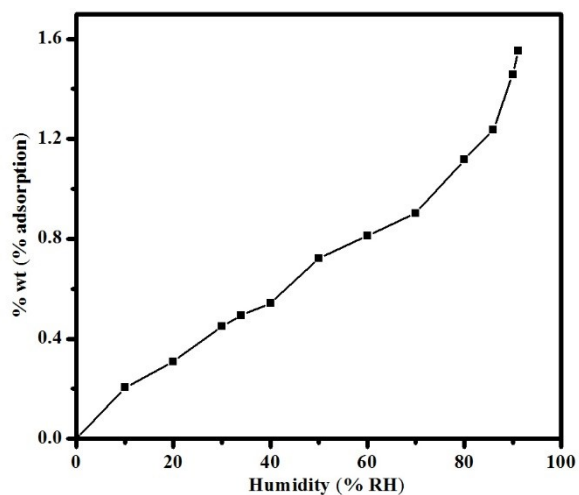

**Fig. S6.** The water adsorption isotherm of **1** at 293 K.

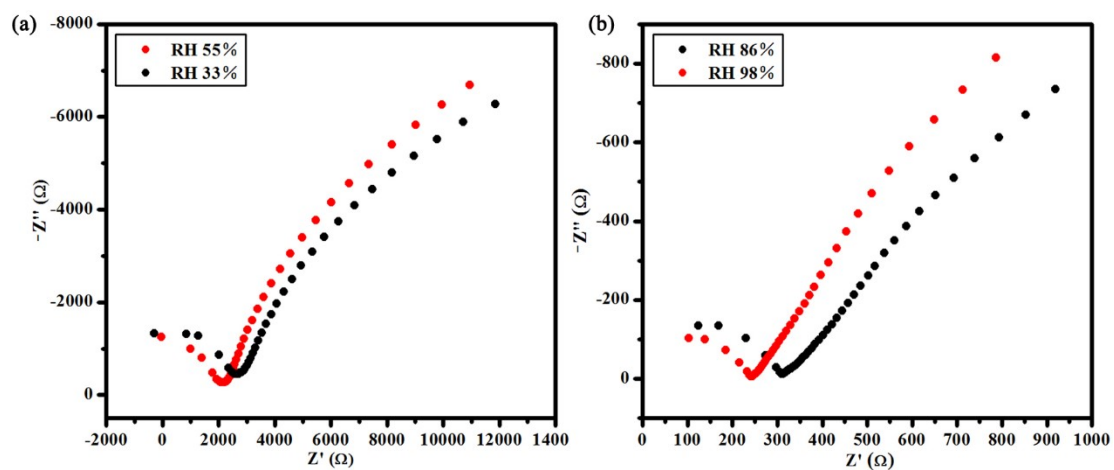

**Fig. S7.** Nyquist plot of compound **1** at 293 K 33% RH and 55% RH (a), 86% RH and 98% RH (b) for second time.

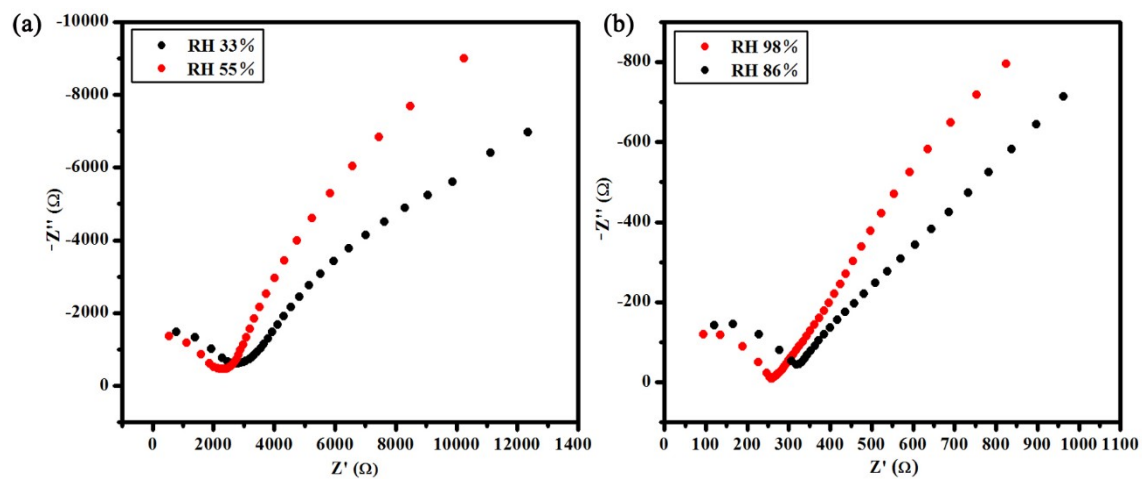

**Fig. S8.** Nyquist plot of compound **1** at 293 K 33% RH and 55% RH (a), 86% RH and 98% RH (b) for third time.

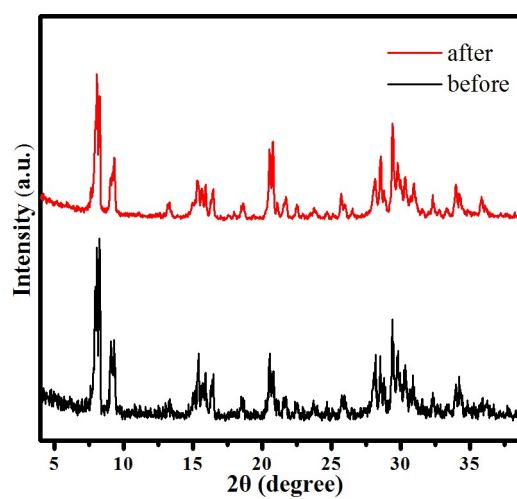

**Fig. S9.** The XRD patterns of the sample (black) and the pellet used impedance measurement (red).

**Table S1.** Bond lengths [ $\text{\AA}$ ] for **1**.

|            |           |
|------------|-----------|
| V(1)-O(18) | 1.620(4)  |
| V(1)-O(16) | 1.925(4)  |
| V(1)-O(12) | 1.937(4)  |
| V(1)-O(25) | 1.955(4)  |
| V(1)-O(22) | 1.961(4)  |
| V(2)-O(23) | 1.629(4)  |
| V(2)-O(14) | 1.934(4)  |
| V(2)-O(12) | 1.939(4)  |
| V(2)-O(11) | 1.943 (3) |
| V(2)-O(20) | 1.957(4)  |
| V(3)-O(17) | 1.637(4)  |
| V(3)-O(25) | 1.937(4)  |
| V(3)-O(20) | 1.938(3)  |
| V(3)-O(12) | 1.968(4)  |
| V(3)-O(15) | 2.004(4)  |
| V(4)-O(21) | 1.626(4)  |
| V(4)-O(16) | 1.929(4)  |
| V(4)-O(14) | 1.941(4)  |
| V(4)-O(8)  | 1.948(4)  |
| V(4)-O(29) | 1.949(3)  |
| V(5)-O(3)  | 1.626(4)  |
| V(5)-O(8)  | 1.932(3)  |
| V(5)-O(22) | 1.932(4)  |
| V(5)-O(16) | 1.951(4)  |
| V(5)-O(7)  | 2.036(3)  |
| V(6)-O(19) | 1.630(4)  |
| V(6)-O(29) | 1.919(4)  |
| V(6)-O(11) | 1.937(4)  |
| V(6)-O(14) | 1.958(4)  |
| V(6)-O(6)  | 2.015(4)  |
| B(13)-O(1) | 1.356(7)  |
| B(14)-O(1) | 1.474(7)  |
| B(10)-O(2) | 1.433(7)  |
| B(11)-O(2) | 1.441(7)  |
| B(15)-O(4) | 1.366(7)  |
| B(12)-O(4) | 1.480(6)  |
| B(16)-O(5) | 1.322(7)  |
| B(17)-O(5) | 1.515(7)  |
| B(11)-O(6) | 1.515(7)  |
| B(12)-O(6) | 1.525(6)  |
| B(10)-O(7) | 1.507(7)  |
| B(14)-O(7) | 1.511(6)  |

|             |          |
|-------------|----------|
| B(8)-O(8)   | 1.467(7) |
| B(12)-O(9)  | 1.426(7) |
| B(17)-O(9)  | 1.457(6) |
| B(15)-O(10) | 1.363(7) |
| B(11)-O(10) | 1.470(6) |
| B(10)-O(11) | 1.478(7) |
| B(8)-O(13)  | 1.444(7) |
| B(14)-O(13) | 1.449(7) |
| B(8)-O(15)  | 1.514(6) |
| B(17)-O(15) | 1.520(6) |
| B(14)-O(20) | 1.483(7) |
| B(11)-O(22) | 1.479(6) |
| B(16)-O(24) | 1.405(7) |
| B(12)-O(25) | 1.482(6) |
| B(16)-O(26) | 1.371(7) |
| B(8)-O(26)  | 1.478(7) |
| B(13)-O(27) | 1.383(7) |
| B(13)-O(28) | 1.369(7) |
| B(10)-O(28) | 1.485(7) |
| B(17)-O(29) | 1.484(7) |
| B(15)-O(30) | 1.373(7) |
| B(11)-O(2)  | 1.441(7) |
| B(11)-O(6)  | 1.515(7) |
| B(12)-O(6)  | 1.525(6) |
| B(17)-O(29) | 1.484(7) |

**Table S2.** Bond angles [deg] for **1**.

|            |            |
|------------|------------|
| O18-V1-O16 | 108.24(19) |
| O18-V1-O12 | 106.06(18) |
| O16-V1-O12 | 93.96(16)  |
| O18-V1-O25 | 107.48(18) |
| O16-V1-O25 | 144.24(16) |
| O12-V1-O25 | 77.79(15)  |
| O18-V1-O22 | 108.77(18) |
| O16-V1-O22 | 78.06(15)  |
| O12-V1-O22 | 145.04(15) |
| O25-V1-O22 | 88.99(16)  |
| O18-V1-V5  | 111.74(15) |
| O16-V1-V5  | 39.26(11)  |
| O12-V1-V5  | 126.63(11) |
| O25-V1-V5  | 122.11(11) |
| O22-V1-V5  | 38.92(11)  |
| O18-V1-V3  | 110.12(16) |
| O16-V1-V3  | 125.89(12) |
| O12-V1-V3  | 39.34(11)  |
| O25-V1-V3  | 38.51(10)  |
| O22-V1-V3  | 121.70(12) |
| V5-V1-V3   | 138.05(4)  |
| O23-V2-O14 | 105.51(19) |
| O23-V2-O12 | 108.29(17) |
| O14-V2-O12 | 94.76(16)  |
| O23-V2-O11 | 107.66(18) |
| O14-V2-O11 | 78.13(16)  |
| O12-V2-O11 | 143.95(15) |
| O23-V2-O20 | 109.82(19) |
| O14-V2-O20 | 144.44(15) |
| O12-V2-O20 | 78.13(15)  |
| O11-V2-O20 | 87.39(15)  |
| O23-V2-V6  | 109.02(15) |
| O14-V2-V6  | 39.42(11)  |
| O12-V2-V6  | 127.04(12) |
| O11-V2-V6  | 38.85(11)  |
| O20-V2-V6  | 120.97(11) |
| O23-V2-V3  | 112.60(15) |
| O14-V2-V3  | 127.13(11) |
| O12-V2-V3  | 39.51(11)  |
| O11-V2-V3  | 120.53(11) |
| O20-V2-V3  | 38.73(10)  |
| V6-V2-V3   | 138.22(4)  |



|            |            |
|------------|------------|
| O17-V3-O25 | 109.52(17) |
| O17-V3-O20 | 110.16(17) |
| O25-V3-O20 | 138.03(16) |
| O17-V3-O12 | 108.02(18) |
| O25-V3-O12 | 77.46(15)  |
| O20-V3-O12 | 77.88(15)  |
| O17-V3-O15 | 106.33(18) |
| O25-V3-O15 | 90.83(15)  |
| O20 V3 O15 | 90.78(14)  |
| O12-V3-O15 | 145.65(15) |
| O17-V3-V2  | 112.60(14) |
| O25-V3-V2  | 110.94(11) |
| O20-V3-V2  | 39.18(11)  |
| O12-V3-V2  | 38.82(10)  |
| O15-V3-V2  | 124.22(10) |
| O17-V3-V1  | 112.73(15) |
| O25-V3-V1  | 38.93(11)  |
| O20-V3-V1  | 110.81(11) |
| O12 V3 V1  | 38.59(11)  |
| O15 V3 V1  | 123.74(11) |
| V2-V3-V1   | 74.70(3)   |
| O21-V4-O16 | 108.58(18) |
| O21-V4-O14 | 106.55(19) |
| O16-V4-O14 | 93.26(16)  |
| O21-V4-O8  | 109.0(2)   |
| O16-V4-O8  | 79.05(15)  |
| O14-V4-O8  | 144.21(16) |
| O21-V4-O29 | 108.21(18) |
| O16-V4-O29 | 143.17(16) |
| O14-V4-O29 | 77.91(15)  |
| O8-V4-O29  | 87.52(15)  |
| O21-V4-V5  | 111.51(15) |
| O16-V4-V5  | 39.86(11)  |
| O14-V4-V5  | 126.61(12) |
| O8-V4-V5   | 39.40(10)  |
| O29-V4-V5  | 121.26(11) |
| O21-V4-V6  | 110.17(15) |
| O16-V4-V6  | 125.56(13) |
| O14-V4-V6  | 39.58(11)  |
| O8-V4-V6   | 120.65(11) |
| O29-V4-V6  | 38.46(11)  |
| V5-V4-V6   | 138.19(4)  |
| O3-V5-O8   | 110.33(19) |
| O3-V5-O22  | 108.79(18) |

|              |              |
|--------------|--------------|
| O8-V5-O22    | 139.25(16)   |
| O3-V5-O16    | 108.92(18)   |
| O8 V5 O16    | 78.91(15)    |
| O22-V5-O16   | 78.13(15)    |
| O3-V5-O7     | 104.21(18)   |
| O8-V5-O7     | 89.86(14)    |
| O22-V5-O7    | 91.35(15) .  |
| O16 V5 O7    | 146.87(16) . |
| O3-V5-V4     | 112.58(14)   |
| O8-V5-V4     | 39.79(10)    |
| O22-V5-V4    | 112.59(11)   |
| O16-V5-V4    | 39.33(11)    |
| O7-V5-V4     | 124.85(10)   |
| O3-V5-V1     | 112.21(15)   |
| O8-V5-V1     | 112.34(11)   |
| O22-V5-V1    | 39.60(10)    |
| O16-V5-V1    | 38.65(11)    |
| O7-V5-V1     | 125.54(11)   |
| V4-V5-V1     | 75.79(3)     |
| O19-V6-O29   | 110.93(19)   |
| O19-V6-O11   | 109.61(19)   |
| O29-V6-O11   | 137.25(16)   |
| O19-V6-O14   | 106.79(18)   |
| O29-V6-O14   | 78.24(15)    |
| O11-V6-O14   | 77.70(15)    |
| O19-V6-O6    | 106.19(17)   |
| O29-V6- O6   | 90.17(15)    |
| O11-V6-O6    | 91.21(15)    |
| O14-V6-O6    | 147.02(15)   |
| O19-V6-V4    | 112.16(15)   |
| O29-V6-V4    | 39.19(10)    |
| O11-V6-V4    | 111.10(11)   |
| O14-V6-V4    | 39.18(11)    |
| O6-V6-V4     | 124.34(11)   |
| O19-V6-V2    | 111.09(15)   |
| O29-V6-V2    | 111.38(11)   |
| O11-V6-V2    | 39.00(10)    |
| O14-V6-V2    | 38.84(11)    |
| O6-V6-V2     | 125.13(11)   |
| V4-V6-V2     | 75.36(4)     |
| B13-O1-B14   | 121.6(4)     |
| B10-O2-B11 . | 121.3(4)     |
| B15-O4-B12   | 121.8(4)     |
| B16-O5-B17   | 122.6(4)     |
| B11-O6-B12   |              |
| B11-O6-V6    |              |
| B12-O6-V6    |              |
| B10-O7-B14   |              |
| B10-O7-V5    |              |
| B14-O7-V5    |              |

114.3(4)  
120.5(3)  
122.5(3)  
113.5(4)  
121.1(3) .  
121.5(3)  
131.3(3)  
127.7(3) .  
100.81(16)  
120.7(4)  
121.6(4)  
129.7(3)  
128.0(3)  
102.15(17)  
143.4(2)  
102.07(16)  
101.67(17)  
120.2(4)  
144.2(2)  
101.74(17)  
101.23(17)  
113.4(4)  
121.6(3)  
121.8(3)  
146.2(2)  
102.09(16)  
100.80(17)  
130.0(3)  
127.8(3)  
102.10(16)  
130.0(3)  
128.6(3)  
101.47(16)  
130.6(3)  
126.8(3)  
102.57(16)  
119.0(4)  
120.5(4)  
130.1(3)  
127.4(3)  
102.35(17)  
110.2(4)  
106.4(4)  
110.4(4)

112.7(4)  
108.0(4)  
109.2(4)  
109.7(4)  
107.4(4)  
109.3(4)  
113.0(4)  
107.9(4)  
109.6(4)  
106.5(4)  
111.3(4)  
110.3(4)  
112.6(4)  
108.7(4)  
107.4(4)  
108.9(4)  
110.6(4)  
109.2(4)  
111.0(4)  
108.7(4)  
108.4(4)  
122.8(5)  
117.5(5)  
119.7(5)  
107.5(4)  
110.1(4)  
110.0(4)  
112.3(4)  
108.5(4)  
108.4(4)  
122.7(5)  
115.6(5)  
121.7(5)  
124.1(5)  
120.2(5)  
115.7(5)  
108.5(4)  
109.8(4)  
110.1(4)  
108.2(4)  
112.8(4)  
107.6(4)

Symmetry transformations used to generate equivalent atoms: #1  $-x+1/2,-y+3/2,-z+1$
